# Supplementary material for: Preparation of a POSS-hybridized molecularly imprinted monolith for the analysis of baicalin and its analogues in a microwave-assisted extract from Scutellaria baicalensis by means of on-line SPME-HPLC and off-line LC-MS/MS
Source: Royal Society of Chemistry journal article supplement (doi:10.1039/c9ay00568d), 2019-01-01
Supplement: c9ay00568d1.pdf [file c9ay00568d1.pdf]

**Preparation of POSS-Hybridized Molecularly Imprinted Monolith  
for Analysis of Baicalin and its Analogues in the Microwave-Assisted  
Extract from *Scutellaria Baicalensis* by means of on-line SPME-  
HPLC and off-line LC-MS/MS**

Xiaodong Bi <sup>1,3,4</sup> \*\*, Wei Tian <sup>2,3,4</sup> #, Xiang Wang <sup>2,3,4</sup>, Wenli Cao <sup>2,3,4</sup>, Le Gao <sup>2,3,4</sup>,  
Shuaishuai Fan <sup>1,3,4</sup>, Yingchun Wang <sup>1,3,4</sup>, Meng Wang <sup>1,3,4</sup> and Liying Niu <sup>1,3,4</sup> \*\*

1. School of Materia Medica, Hebei University of Chinese Medicine, No.3 Xingyuan Lu, 050200, Shijiazhuang, Hebei, China
2. Department of Experiment Center, Hebei University of Chinese Medicine, No.3 Xingyuan Lu, 050200, Shijiazhuang, Hebei, China
3. Hebei Traditional Chinese Medicine Formula Granule Technology Innovation Center, No.326 Xinshi Nan Lu, 050091, Shijiazhuang, China
4. Traditional Chinese Medicine Formula Granule Research Center of Hebei Province University, No.326 Xinshi Nan Lu, 050091, Shijiazhuang, China;

#X.D. Bi and W. Tian contributed equally.

\*Corresponding author (submitting author). Email: xiaodongb\_pharm@126.com

\*\*Corresponding author. Email: niuliyinggy@163.com

## Contents

**Figure S1** Chromatograms of MIP and NIP for analysis of baicalin by CLC.

**Figure S2** Chromatograms for different eluting flow rate of 0.01mL/min, 0.02mL/min and 0.03mL/min. ( marked as 0.01, 0.02, 0.03 in the figure )

**Figure S3** Chromatograms for analysis of baicalin by in-tube SPME-HPLC

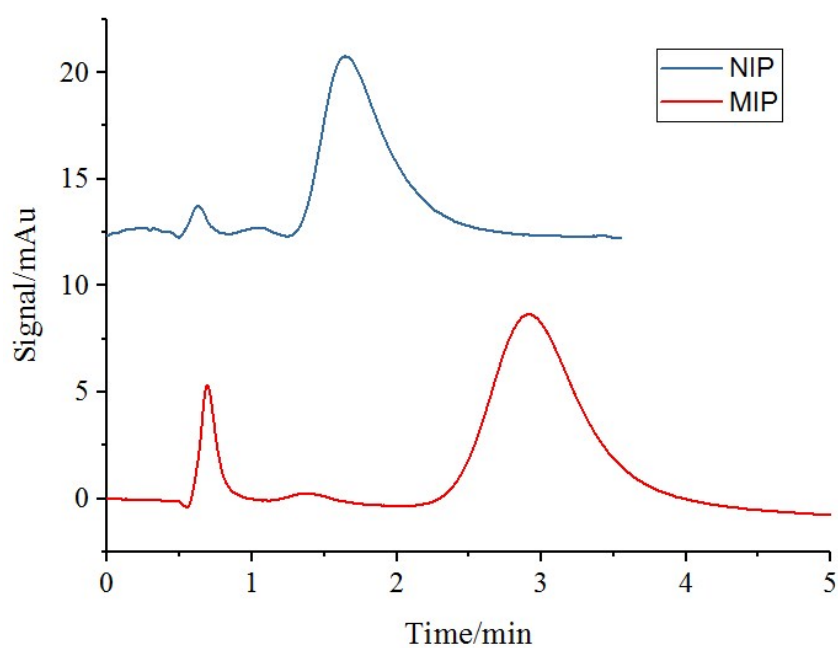

**Figure S1**

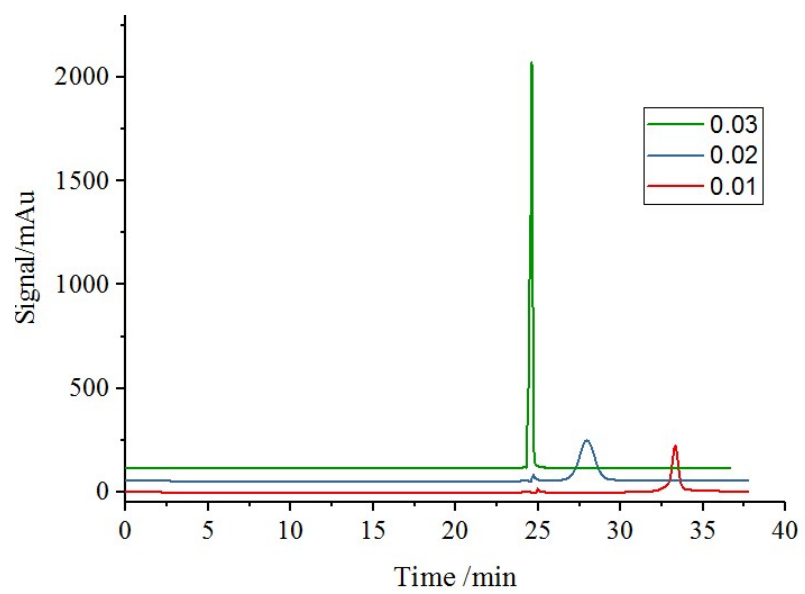

**Figure S2**

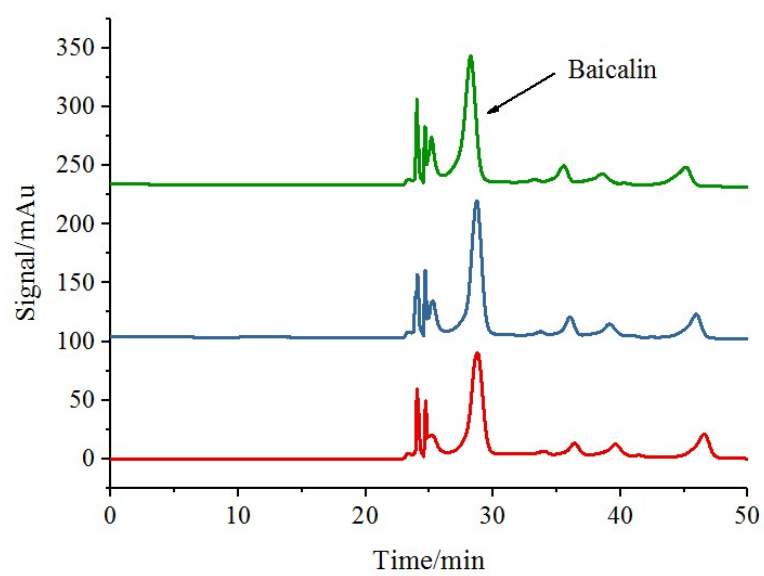

**Figure S3**
